# Supplementary material for: Synthesis, characterization and evaluation of aqueous Zn-based quantum dots for bioapplications
Source: Royal Society of Chemistry journal article supplement (doi:10.1039/d1dt04021a), 2022-01-01
Supplement: d1dt04021a1.pdf [file d1dt04021a1.pdf]

## **Synthesis and characterization of aqueous Zn-based quantum dots for Bioapplication**

---

Athina Papadopoulou<sup>a,b</sup>, Nikolaos Chalmes<sup>c</sup>, Dimitrios Gournis<sup>c</sup>, Nikoleta Kostopoulou<sup>a</sup>,  
Eleni K. Efthimiadou<sup>\*a,b</sup>

**a** Inorganic Chemistry Laboratory, Chemistry Department, National and Kapodistrian University of Athens, Panepistimiopolis, Zografou 157 71, Greece

**b** NCSR "Demokritos", Sol-Gel Laboratory, Institute of Nanoscience and Nanotechnology 153 10 Aghia Paraskevi Attikis, Greece.

**c** Department of Materials Science & Engineering, University of Ioannina, 45110 Ioannina, Greece.

\*Corresponding author Prof. Eleni K. Efthimiadou, e-mail address: [efthim@chem.uoa.gr](mailto:efthim@chem.uoa.gr),  
[e.efthimiadou@inn.demokritos.gr](mailto:e.efthimiadou@inn.demokritos.gr) tel.: +30 210 7274858

## Supporting Information

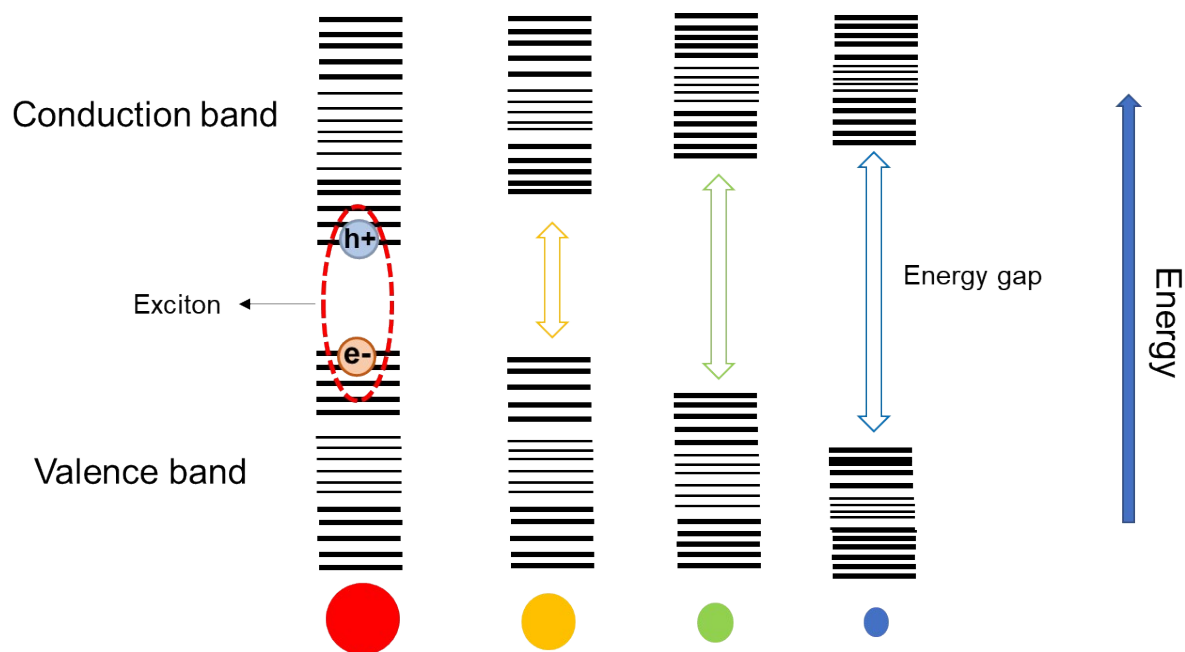

Figure S 1: schematic representation of QDs' size variation and exciton radius.

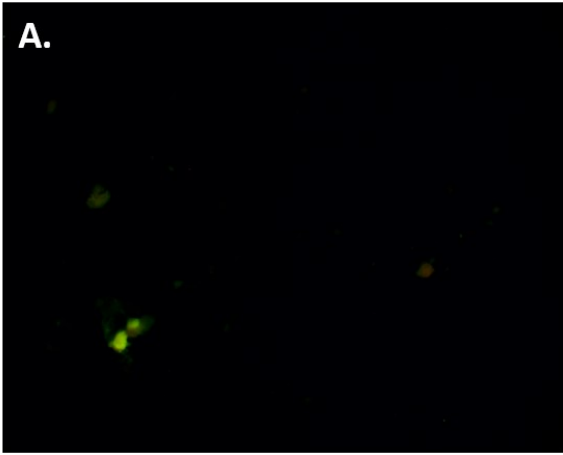

**ZnO**

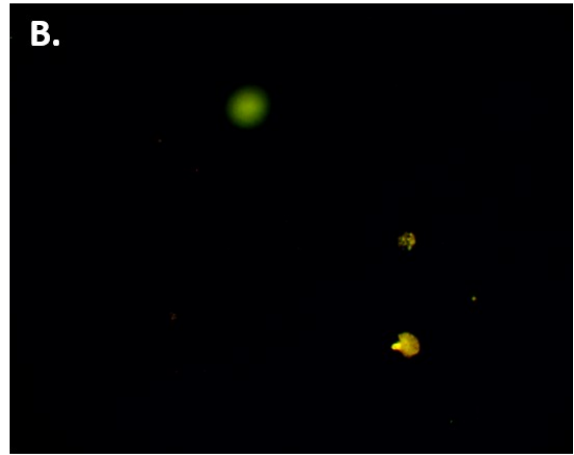

**ZnSe**

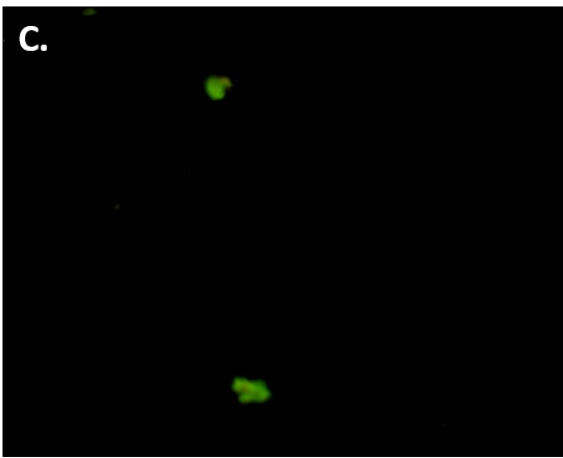

**ZnS:Mn**

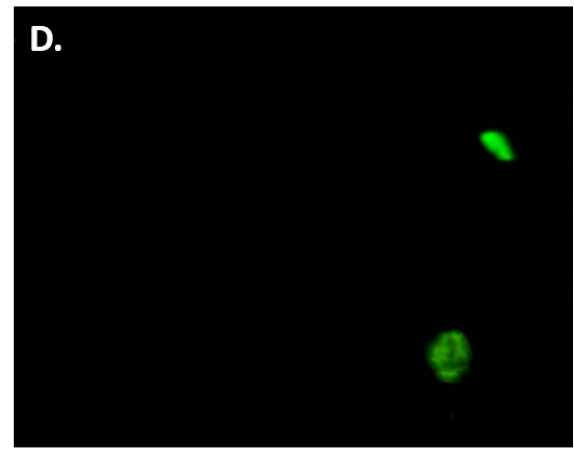

**ZnS:Cd**

*Figure S 2: Fluorescence of Qds: A. ZnO, B. ZnSe, C. ZnS:Mn, D. ZnS:Cd*
